# Supplementary material for: Localization of Fe‐S Biosynthesis Machinery in Cryptosporidium parvum Mitosome
Source: PubMed Central journal article supplement (PMC6282951; doi:10.1111/jeu.12663), 2018-07-12
Supplement: JEU-65-913-s001.pdf [file JEU-65-913-s001.pdf]

## SUPPORTING INFORMATION:

### Localization of Fe-S Biosynthesis Machinery in *Cryptosporidium parvum* Mitosome by Christopher N. Miller, Lyne Jossé & Anastasios D. Tsaousis

**Figure S1:** Conservation of functionally important residues in *Cryptosporidium* cysteine desulphurase (IscS) sequences.

**Figure S2:** Conservation of functionally important residues in *Cryptosporidium* scaffold protein (IscU) sequences.

**Figure S3:** Identification of candidate functionally important residues in *Cryptosporidium* Frataxin sequences.

**Figure S4:** Detection of CpIscS via indirect immunofluorescence.

**Figure S5:** Detection of CpIscU via indirect immunofluorescence.

**Figure S6:** Detection of CpFrataxin via indirect immunofluorescence.

**Figure S7:** Work flow for the yeast-based functional complementation assay.

**Figure S8:** Electron Microscope Images of *C. parvum* life cycle stages in an infected COLO-680N culture.

**Table S1:** Identified proteins potentially involved in mitochondrial Fe-S cluster assembly in various *Cryptosporidium* species as extracted from NCBI and CryptoDB using BLASTP.

**Table S2:** In silico mitochondrial prediction of proteins involved in Fe-S cluster assembly in *Cryptosporidium* species.

**Video S1:** Animation of cellular staining of *Cryptosporidium parvum* cell using confocal microscopy

Supplementary Figure S1

*C. parvum* -----MIVHRYCROWAPSVVVRGISKLAFFSSMSSI AKK-----RPAYFDYQATTPVDRVLDKMM  
*C. hominis\_UdeA01* -----MIVHRYCROWAPSVVVRGISKVAFFSSMSSI AKK-----RPAYFDYQATTPVDRVLDKMM  
*C. hominis\_TU502* -----MIVHRYCROWAPSVVVRGISKVAFFSSMSSI AKK-----RPAYFDYQATTPVDRVLDKMM  
*C. ubiquitum* -----MIVQGYRQLIPGVMRSVAKVAFFSSMTSITKK-----RPVYFDYQATTPVDRVLDKMM  
*C. andersoni* -----MNMRTLPLGVSFISRHSKYLRSFSTKLKNO-----SIQRPLYFDYQATTPVDRVLDKML  
*C. muris* -----MNMKTLPLGVSFISRRSKYLRSFSSKLRQ-----SIQRPLYFDYQATTPVDRVLDKML  
*S. cerevisiae* -MLKSTATRSITRLSQVYNVPAATYRACLVSRRFYSPPAAGVKLDDNFSLEHTDIQAAAKAQASARASASGTTTPDAVVASGSTAMSHAYQENTGFGTRPIYLDMQATTPVDRVLDTML  
*H. sapiens* MLLRAAWRRRAAVATAAPGPKPAAPTRGLRL-----RVGDRAPQSAVPADTAAAPEV-----GPVLRPLYMDVQATTPVDRVLDAML  
*E. coli* -----MKL-----PIYLDYSATTPVDRVAEKMM

*C. parvum* PFFT--EKFG SHSRTHGYGWEAEEAVENARTNIANLIKCLPKEIIFTSGATESNNTIIRGVCDIYGDIENTKNHIITTOIEHKCVLSTLRELELKGFRVTYLKVNNKGLISLEELEKSI  
*C. hominis\_UdeA01* PFFT--EKFG SHSRTHGYGWEAEEAVENARTNIANLIKCLPKEIIFTSGATESNNTIIRGVCDIYGDIENTKNHIITTOIEHKCVLSTLRELELKGFRVTYLKVNNKGLISLEELEKSI  
*C. hominis\_TU502* PFFT--EKFG SHSRTHGYGWEAEEAVENARTNIANLIKCLPKEIIFTSGATESNNTIIRGVCDIYGDIENTKNHIITTOIEHKCVLSTLRELELKGFRVTYLKVNNKGLISLEELEKSI  
*C. ubiquitum* PFFT--EKFG SHSRTHGYGWEAEDAVESARTNIANLIKQPKIIFTSGATESNNTIIRGVCDVYGDIKSKKNHIITTOIEHKCVLSTLRELELKGFRVTYLKVNNKGLISLEELEKSI  
*C. andersoni* PLYT--ELYG SHSRTHGYGWETEDLIENARDEVAKLINCLSKEVIFTSGATESNNTIIRGCENYGNIKEGRNHIITTOIEHKCVLSTLRELELKGFRVTYLKVDRDGLLSLKSLESAI  
*C. muris* PLYT--ELYG SHSRTHGYGWETEDLIENARDEVAKLINCLSKEVIFTSGATESNNTIIRGCENYGNIKEGRNHIITTOIEHKCVLSTLRELELKGFRVTYLKVDRDGLLSLKSLESAI  
*S. cerevisiae* KFYT--GLYG PHSNTHSYGWETNTAVENARAHVAKMINADPKEIIFTSGATESNNMVLKGVPRFY---KTKKHIITTRTEHKCVLEAARAMMKEGFEVTFLNVDQGLIDLKELEDAI  
*H. sapiens* PYLI--NYYG PHSRTHAYGWESEAAMERARQQVASLIGADPREIIFTSGATESNNIAIKGVARFY---RSRKKHLITTOIEHKCVLSDCRSLEAEGFQVTYLPVQKSGIIDLKELEAAI  
*E. coli* QFMTMDGTFG PASRSHRFGWQAEAAVDIARNQIADLVGADPREIVFTSGATESDNLAIKGAANFY---QKKGKHIITSKTEHKAVLDTRCQLEREGFEVTYLAPQRNGIIDLKELEAAM

*C. parvum* IPGETILASIMHV NEIGVIQPMNLIGEICKKYNVLFHSDVAOGLGKINIDVDKWNADFLSLSAHKVYGPKGIGAFYIRSKPRRRIKPLIFGGGQERGMRSGMTMPVPLAVGFGEACKIAS  
*C. hominis\_UdeA01* IPGETILASIMHV NEIGVIQPMNLIGEICKKYNVLFHSDVAOGLGKINIDVDKWNADFLSLSAHKVYGPKGIGAFYIRSKPRRRIKPLIFGGGQERGMRSGMTMPVPLAVGFGEACKIAS  
*C. hominis\_TU502* IPGETILASIMHV NEIGVIQPMNLIGEICKKYNVLFHSDVAOGLGKINIDVDKWNADFLSLSAHKVYGPKGIGAFYIRSKPRRRIKPLIFGGGQERGMRSGMTMPVPLAVGFGEACKIAS  
*C. ubiquitum* IPGETILVSIHV NEIGVIQPMNLIGELCKKHNVLHSDVAOGLGKINIDVDKWNADFLSLSAHKVYGPKGIGAFYIRSKPRRRIKPLIFGGGQERGMRSGMTIPVPLAVGFGEACKIAS  
*C. andersoni* ESGKTILVSMFV NEIGVIQPMESIGEVCRRKHGVLHSDVAOGLGKQLIDVNKWKVDFLSMSGHKIYGPKGIGAFYIRSKPRRRIKPLIFGGGQERGLRSGTLAVPLVVGFGAEACRIAN  
*C. muris* ESGKTILVSMFV NEIGVIQSMESIGEVCRRKHGVLHSDVAOGLGKQLIDVNKWKVDFLSMSGHKIYGPKGIGAFYIRSKPRRRIKPLIFGGGQERGLRSGTLAVPLVVGFGAEACRIAN  
*S. cerevisiae* RP-DTCLVSMAV NEIGVIQPIKEIGAICRKNKIYFHTDAAQAYGKIHDVNMNIDLSSSHKIYGPKGIGAFYIRRRRPRVRELEPLLSGGGQERGLRSGTLAPPLVAGFGEAARLMK  
*H. sapiens* QP-DTSLVSMTV NEIGVKQPIAEIGRICSSRKVYFHTDAAQAVGKIPLDNDMKIDLMSISGHKIYGPKGIGAFYIRRRRPRVREALQSGGGQERGMRSGMTVPTPLVVLGAAACEVAQ  
*E. coli* RD-DTILVSIHV NEIGVVQDIAAIGEMCRARGIYHV DATQSVGKLPIDLSQLKVDLMSFSGHKIYGPKGIGALYVRRKPRVRIEAQMHGGGHERGMRSGLPVHQIVGMGEAYRIAK

*C. parvum* SEMNSDSIHVKSLYDKLYKGITTLQPDVELNGCGVNRMFNGLNLSFTGVEGESLMMKLYSLALSSGSACTSASLEPSYVLAIGVGEDVAHTSIRFGLGFTKHEDVDKAVKEIVESVTL  
*C. hominis\_UdeA01* SEMNSDSIHVKSLYDKLYKGITTLQPDVELNGCGVNRMFNGLNLSFTGVEGESLMMKLYSLALSSGSACTSASLEPSYVLAIGVGEDVAHTSIRFGLGFTKHEDVDKAVKEIVESVTL  
*C. hominis\_TU502* SEMNSDSIHVKSLYDKLYKGITTLQPDVELNGCGVNRMFNGLNLSFTGVEGESLMMKLYSLALSSGSACTSASLEPSYVLAIGVGEDVAHTSIRFGLGFTKHEDVDKAVKEIVESVTL  
*C. ubiquitum* SEMNLDSIHVKSLYDKLYKGITTLQPDVELNGCSINRMFGLNLSFAGVEGESLMMKLYSMALSSGSACTSSSLEPSYVLAIGVGEDVAHTSIRFGLGFTRHEDVDKAVKEIVESVTL  
*C. andersoni* DEMVRDSIHVKKLYHRLYHGIQSQVPNIKLNGSPIHRCFNNLNSFAGVEGESLMMKQLSALSSGSACTSASLEPSYVLAIGIDEETAHTSIRFGLGFTTPSEIDLAVDEVVKAVSS  
*C. muris* DEMVRDSIHVKKLYHKLHGIQSQVPNIKLNGSSIHRCFNNLNSFAGVEGESLMMKQLSALSSGSACTSASLEPSYVLAIGVDEETAHTSIRFGLGFTTPSEIDLAVDEVVKAVSS  
*S. cerevisiae* KEFDNDQAHIKRLSDKLVKGLL-SAEHTTLNGSPDHRYPGCVNVSFAYVEGESLLMALRDIALSSGSACTSASLEPSYVLAHALGKDDALAHSSIRFGIGFTSTEEVDVYVAVSDRVKVF  
*H. sapiens* QEMEYDHKRIKLSERLIQINIMKSLPDVVMNGDPKHHYPGCINLSFAYVEGESLLMALKDALSSGSACTSASLEPSYVLAIGTDEDLAHSSIRFGIGFTTTEEVDYVTEKCIQHVKR  
*E. coli* EEMATEMERLRGLRNRLWNGIK-DIEEVLNGDLEHGAPNINLVSFNYVEGESLIMALKDALVSSGSACTSASLEPSYVLRALGLNDELALAHSSIRFSLGFTTTEEIDYTIELVRSIGR

*C. parvum* LRKMSPLWDSITDTKVKDEESLKWTT--  
*C. hominis\_UdeA01* LRKMSPLWDSITDTKVKDEESLKWTT--  
*C. hominis\_TU502* LRKMSPLWDSITDTKVKDEESLKWTT--  
*C. ubiquitum* LRKMSPLWDIDGTRVKNEESLKWTT--  
*C. andersoni* LRNMSPIDQINSTNPSDISSPIWTT--  
*C. muris* LRNMSPIDQINSTNSSDISGPIWTT--  
*S. cerevisiae* LRELSPLWEMVQEG--IDLNSIKWSGH  
*H. sapiens* LREMSPLWEMVQDG--IDLKSIKWTQH  
*E. coli* LRDLSPWEMYKQG--VDLNSIEWAHH

## Supplementary Figure S2

*C. parvum* -MLQLRQLIDKRILIKKCVPIQRLFYSDTVHDHFRNPRNVGSLPSDDKNVGTAVVGKASCGDVVKLQVDIRD--GIIKDAKFKTFGCGSAIASTSYATELIIIGKTTEEALKINNKTIA  
*C. hominis* UdeA01 -MLQLRQLIDKRILIKKCVPIQRLFYSDTVHDHFRNPRNVGSLPSDDKNVGTAVVGKASCGDVVKLQVDIRD--GIIKDAKFKTFGCGSAIASTSYATELIIIGKTTEEALKINNKTIA  
*C. hominis* TU502 -MLQLRQLIDKRILIKKCVPIQRLFYSDTVHDHFRNPRNVGSLPSDDKNVGTAVVGKASCGDVVKLQVDIRD--GIIKDAKFKTFGCGSAIASTSYATELIIIGKTTEEALKINNKTIA  
*C. ubiquitum* -MLQLRNFVDKRILLKKCVPIQRLFYSNVVNDHFRNPRNVGSLPSDDKNVGTAVVGKAAACGDVVKLQVSIKD--GVIKDAKFKTFGCGSAIASTSYATELIIIGKTTEEALKVNNKTIAN  
*C. andersoni* MMIVVRSCTIR--CKQHLSLIAQKAMYSEAVHDHFRNPRNVGTLPTDKKNVGTAVVGKAAACGDVVKLQVSIKD--GIIKDAKFKTFGCGSAIASSSYVTELIIGKTPEDALKIKNTDIAN  
*C. muris* MMIAVRNCITR--CKQHLSLIAQKAMYSEAVHDHFRNPRNVGTLPSDKKNVGTAVVGKAAACGDVVKLQVSIKD--GVIKDAKFKTFGCGSAIASSSYVTELIIGKTPEDALKIKNTDIAN  
*S. cerevisiae* MFARLANPAHFKPLTGSHITRAAKRLYHPKVIDHYTNPRNVGSMKSLANVGTGIVGAPACGDVVKLQIQVNDKSGIIEENVKFKTFGCGSAIASSSYMTELVRGMSLDEAVKIKNTEIAK  
*H. sapiens* -----MVLIDMSVDLSTQVVDHYENPRNVGSLDKTSKNVGTGLVGAPACGDVVKLQIQVDEK-GKIVDARFKTFGCGSAIASSSLATEWVKGKTVEEALTIKNTDIAK  
*E. coli* -----MAVSEKVIDHYENPRNVGSLDNDENVGSMVGPACGDVVKLQIKVNDK-GIIVDARFKTYGCGSAIASSSLATEWVKGKSLDEAQAIAKNTDIAE

*C. parvum* HLNLPPIKLHCSLLAEDAIAKHAIKNYQDKQLKS-----  
*C. hominis* UdeA01 HLNLPPIKLHCSLLAEDAIAKHAIKNYQDKQLKS-----  
*C. hominis* TU502 HLNLPPIKLHCSLLAEDAIAKHAIKNYQDKQLKS-----  
*C. ubiquitum* HLNLPPIKLHCSLLAEDAIAKHAIKNYQEKQOES-----  
*C. andersoni* YLNLPVVKLHCSLLAEDAVHLAIKDYQSKQSTSDDKSSSVNISYSDDKNVNPNTK  
*C. muris* YLNLPVVKLHCSLLAEDAVHLAIKDYQSKQSTSDDKSSSVNISYSDDKNVDPDTK  
*S. cerevisiae* ELSLPPVKLHCSMLAEDAIAKAAIKDYKTKRNPVSLH-----  
*H. sapiens* ELCLPPVKLHCS-----KSVLFPAAEKTQLSP-----  
*E. coli* ELELPPVKIHCYILAEDAIAKAAIADYKSKREAK-----

### Supplementary Figure S3

*C. parvum* Iowa -----MNSIKLLNLKVVQNLKSFNTQYKVFNFRRKSI STLKFLCDRNSKFVPPPL  
*C. hominis* -----MNSIKLLNLKVVQNLKSFNTPYKVFNFRRKSI STLKFLCDSNPKFVPPPL  
*C. ubiquitum* -----**MNSIKLLNLKIIQNLNRFNSSCKIFNFRNSAIP LKFLFDNNYKLYVLK**  
*C. andersoni* -----**MKCITIFNIQII**----**GSLFKKSQILSKKISFKYFCNND**----**FISIR**  
*C. muris* -----**MKCIAIFNIQTI**----**GSLFKKSQILSKKIPFKYFCNND**----**LISIR**  
*S. cerevisiae* -----**MIKRSL**-----**ASLVRVSSVMGRRYMIAAAGGERARFCPAV**  
*H. sapiens* MWTLGRRVAVGLLASPSPAQAQTLTRVPRPAELAPLCGRRGLRTDIDATCTPRASSNQ  
*E. coli* -----MND-----

*C. parvum* Iowa AHN-LLKLKKNRIYTNSSDIS-----QFSSKTEGLFFETLKKLSQLLD--N  
*C. hominis* AHN-LLKLKKNRIYTNSSDIS-----QFSSKTEGLFFETLKKLSQLLD--N  
*C. ubiquitum* **AHS-ILTIQKSRI**NTNSLDIS-----QFNLKTEFLFFETLKKLSQLLD--S  
*C. andersoni* **KFS-I--INKYP**KYFTTISIA-----DFNNKADQLLHIISFKIINTQD--Q  
*C. muris* **KFS-I--INKYP**KYFTTISIA-----DFNNKADQLLHIISFKIINTQD--Q  
*S. cerevisiae* TNKKNHTVNTFQKRFVESSTDGQVVPQEVNLNPLEKYHEEADDYLDHLLDSLEELSEAHP  
*H. sapiens* GLNQIWNVVKQSVYLMNLRKSGTLGHPGSLD--ETTYERLAEETLDSIAEFFEDLAD-KP  
*E. coli* -----S-----EFHRLADQLWLTIEERLDDWDG--D

$\alpha 1$

*C. parvum* Iowa GLLSDIDL--HDEFMNISFNLNGEK---NTIVISKQPATNQIWYSSPLRKPDPYFEF-NSD  
*C. hominis* GLLSDIDL--HDEFMNISFNLNGEK---NTIVISKQPATNQIWYSSPLRKPDPYFEF-NSD  
*C. ubiquitum* GFLSDIDL--HDEFMNIITFNLNQV---NTIVISKQPATKQIWYSSPLRKPDPYFEF-NSD  
*C. andersoni* NLI**DD**IDC--HDEFNITFRYKDRQSSSGTIVISKQSATKQMWYSSPMRPPDYFEF-ENN  
*C. muris* NLI**DD**IDC--HDEFNITFRYKDRQ--SSGTIVISKQSATKQIWYSSPIRPPDYFEF-ESN  
*S. cerevisiae* **DCIPD**VEL--SHGVMTEIP-----AFGTYVINKQPPNKQIWLASPLSGPNRFDLLDGE  
*H. sapiens* YTF**EDYD**VSVFGSGVLTVKLG--GDL---GTYVINKQTPNKQIWLSSPSSGPKRYDWTGKN  
*E. coli* ---**SDIDCE**INGGVLTITFE-NGSK-----IINRQEPHQVWLATK-QGGYHFDLKGDE

$\beta 1$

$\beta 2$

$\beta 3$

$\beta 4$

$\beta 5$

*C. parvum* Iowa WRSNRTNKTLFEVLNDDLYKATGIHVNL-----  
*C. hominis* WRSNRTNKTLFEVLNDDLFKATGIHVNL-----  
*C. ubiquitum* WRSNRTNETLFEALHDDLKATGIHVNF-----  
*C. andersoni* WSKRSGLSLFEVLESDFEGTGLKFNFLFK-----  
*C. muris* WSKRSGLSLFEALESDFEGTGLKFNFLFK-----  
*S. cerevisiae* WVSLRNGTKLTDILTEEVEKAISKQ-----  
*H. sapiens* WVFSDHGVSLHELLAAELTKALKTKLDLSWLAYS GKDA  
*E. coli* WICDRSGETFWDLLEQAATQQAGETVSFR-----

$\beta 6$

$\alpha 2$

# Supplementary Figure 4

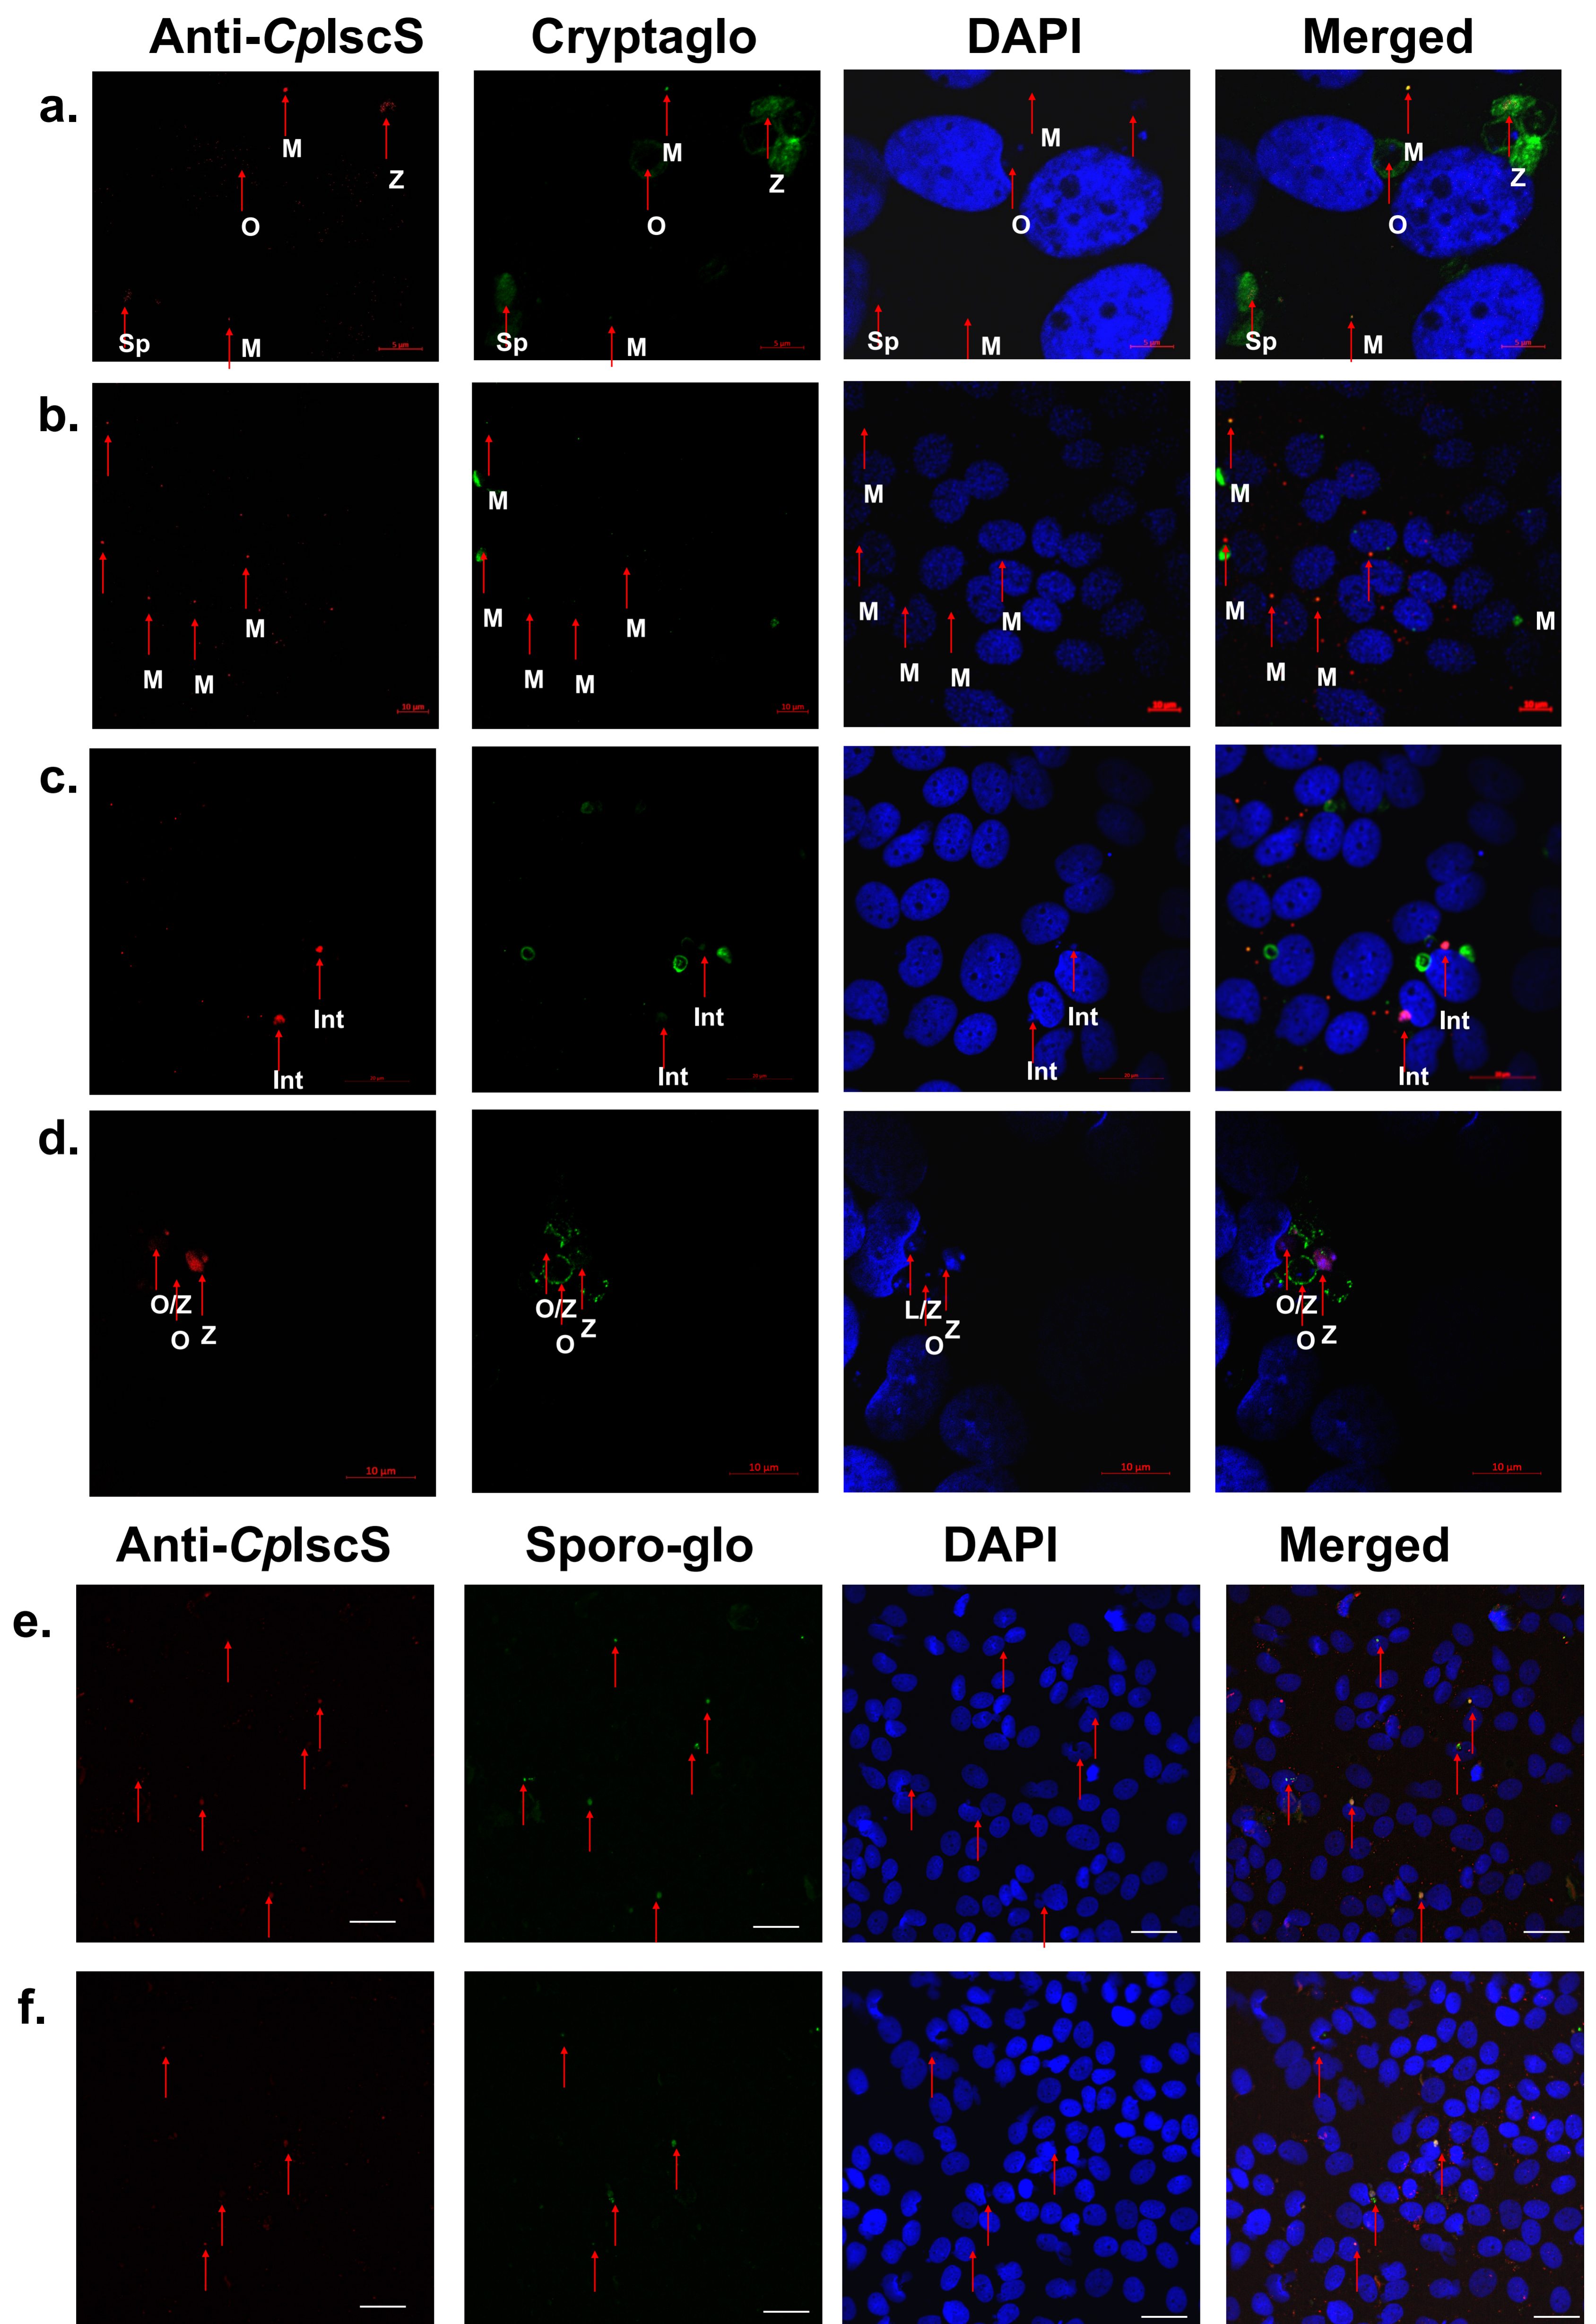

Supplementary Figure S5

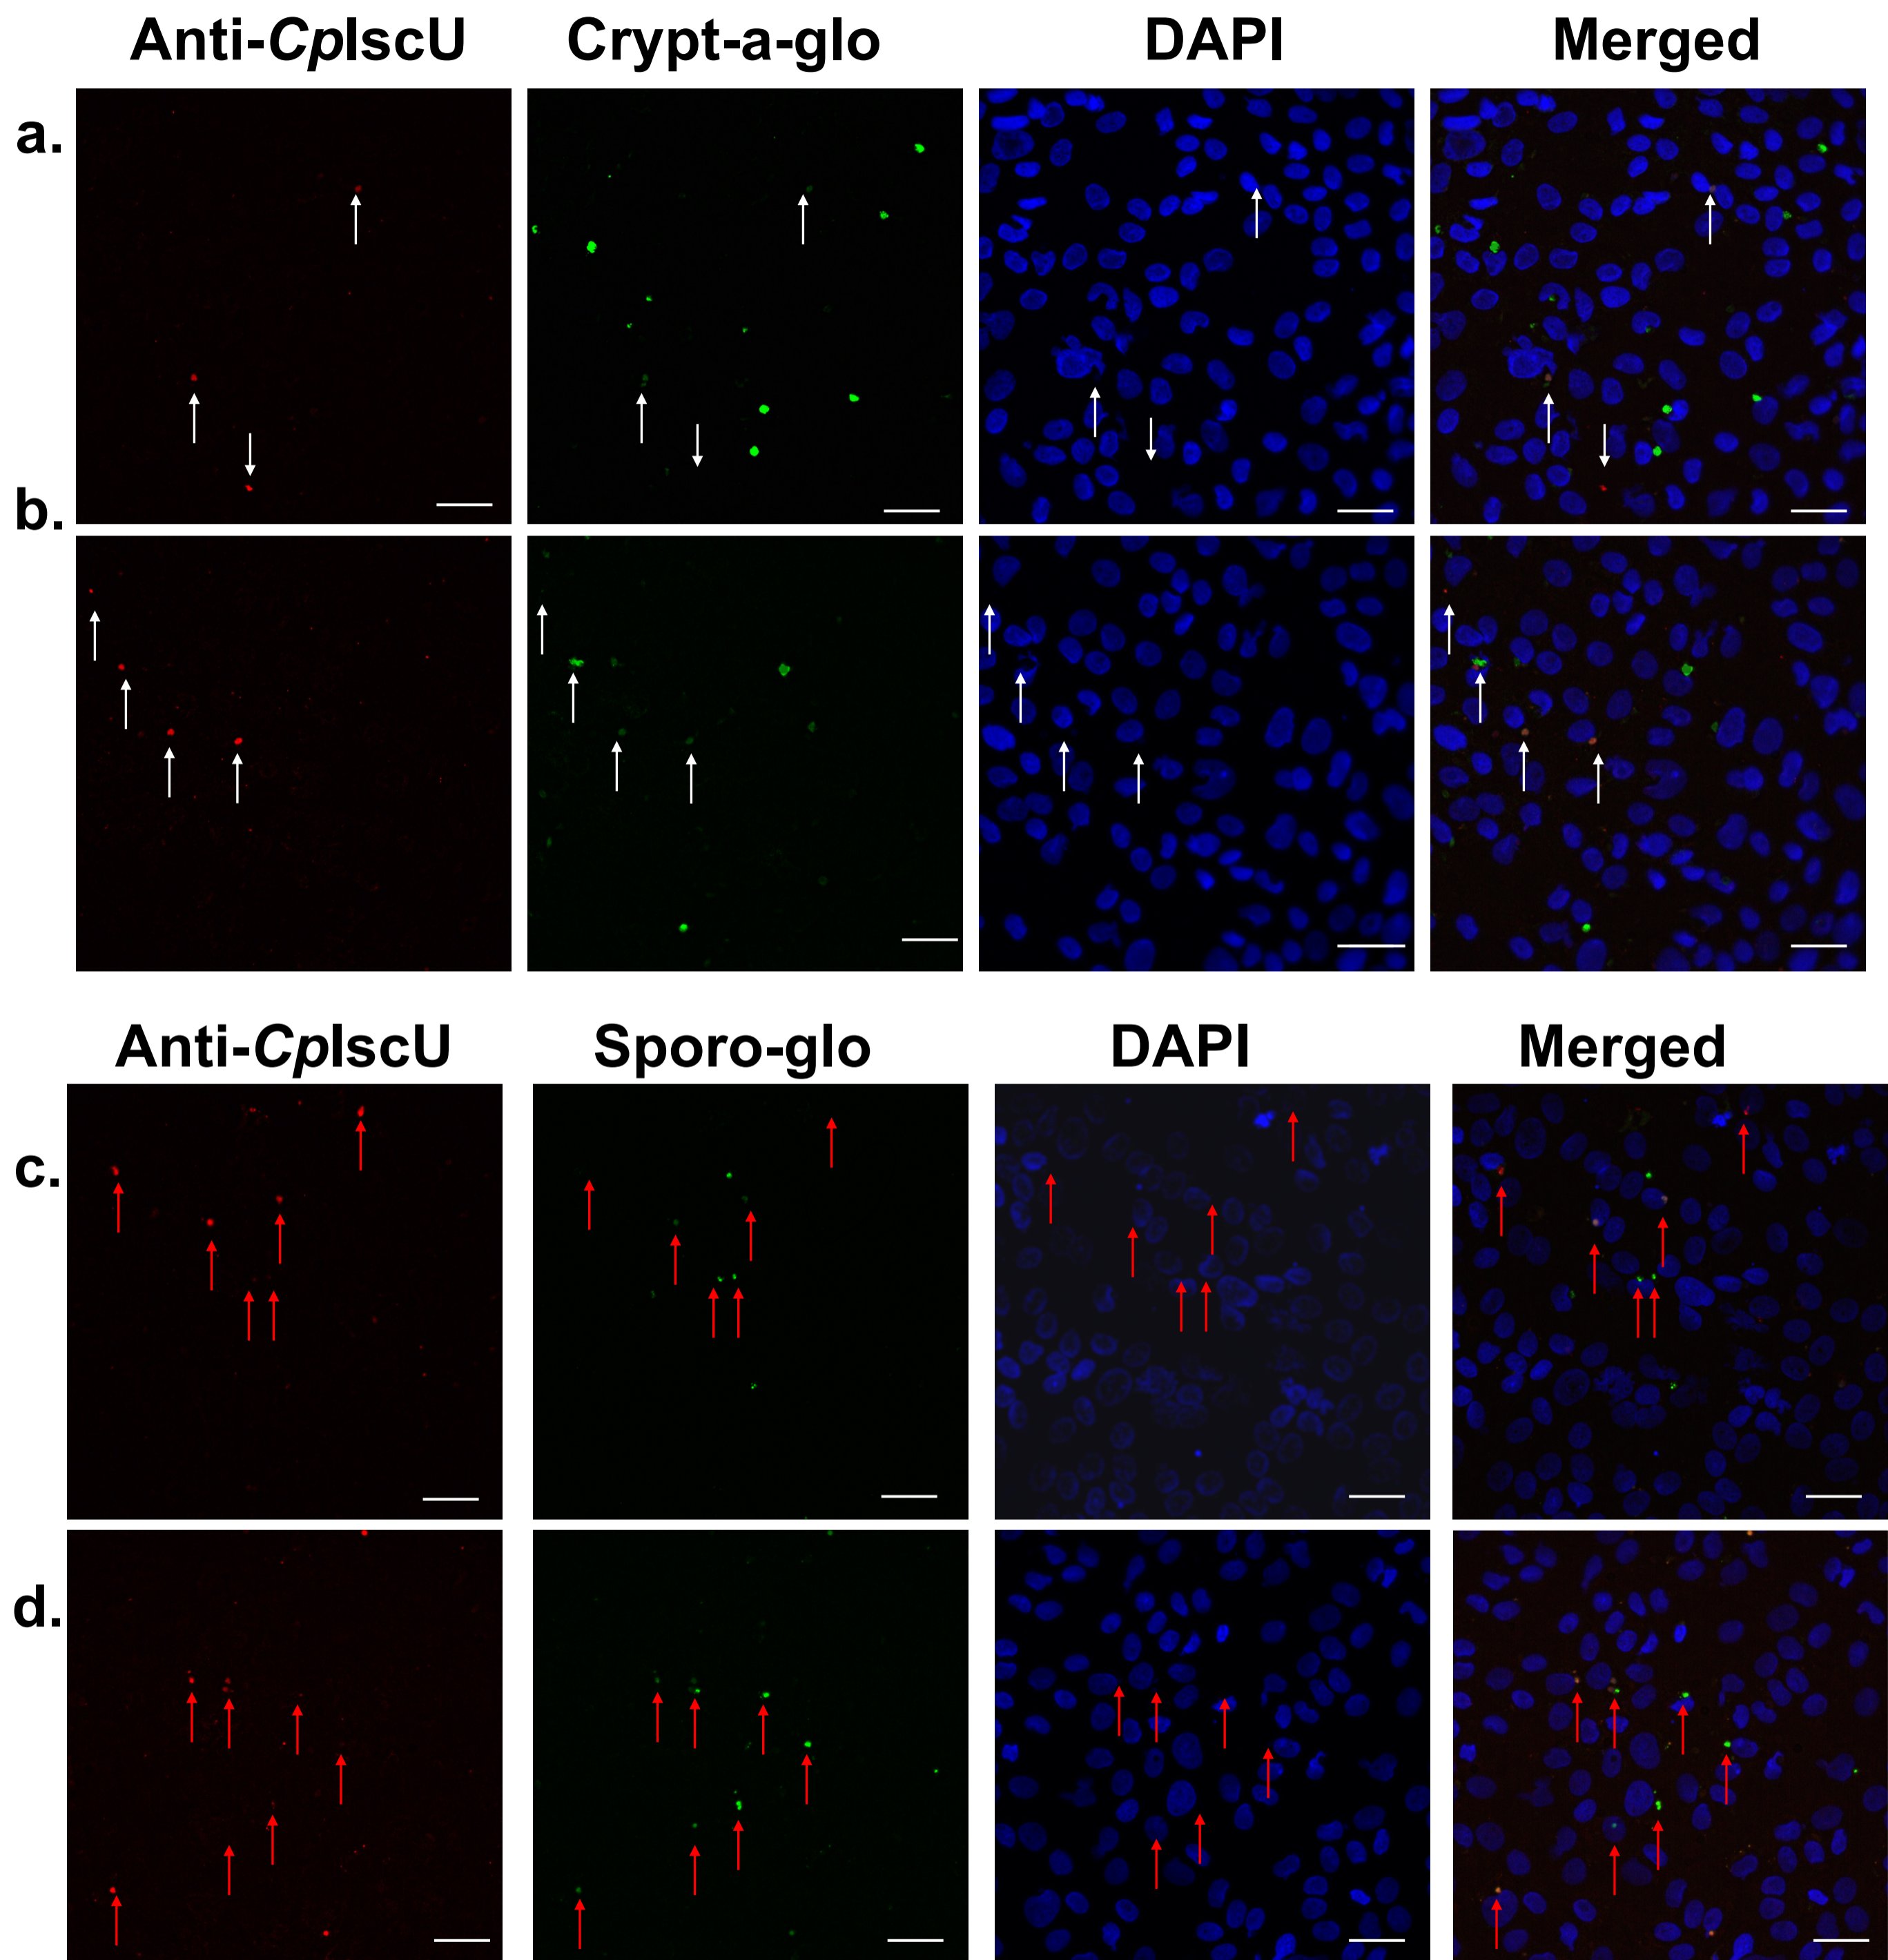

**Anti-CplScU**

**Sporo-glo**

**DAPI**

**Merged**

**e.**

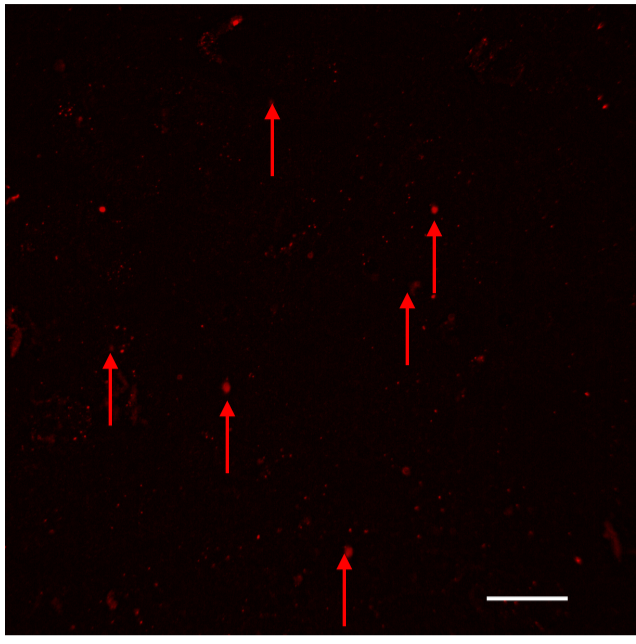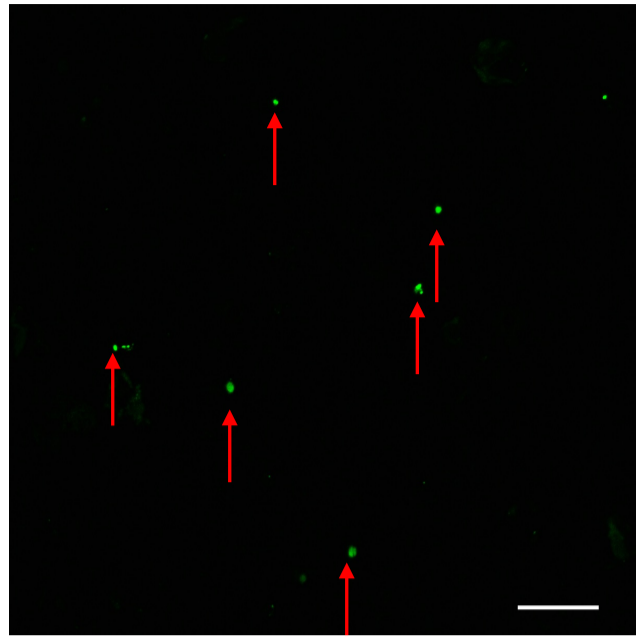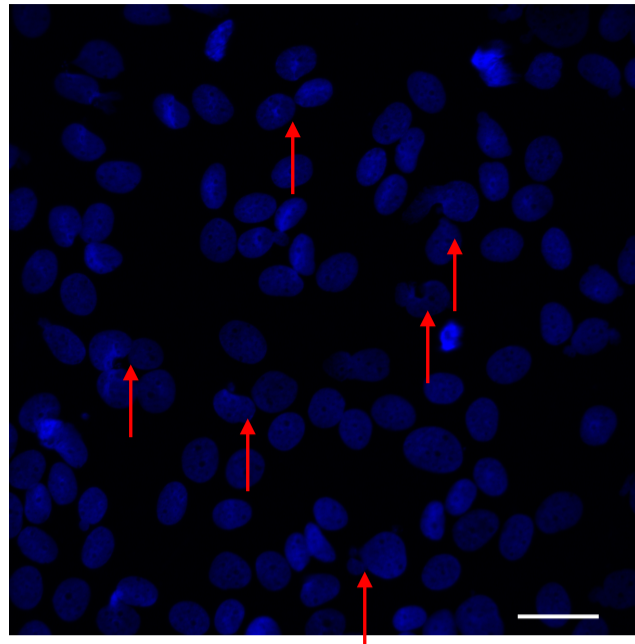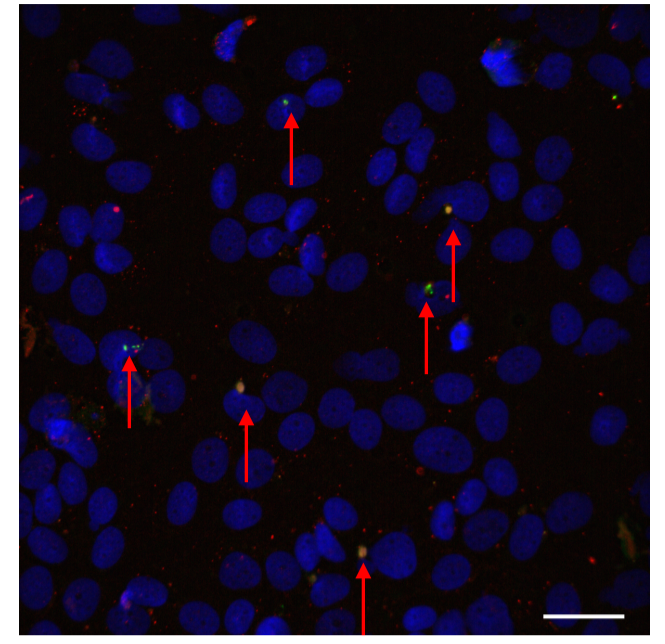

**f.**

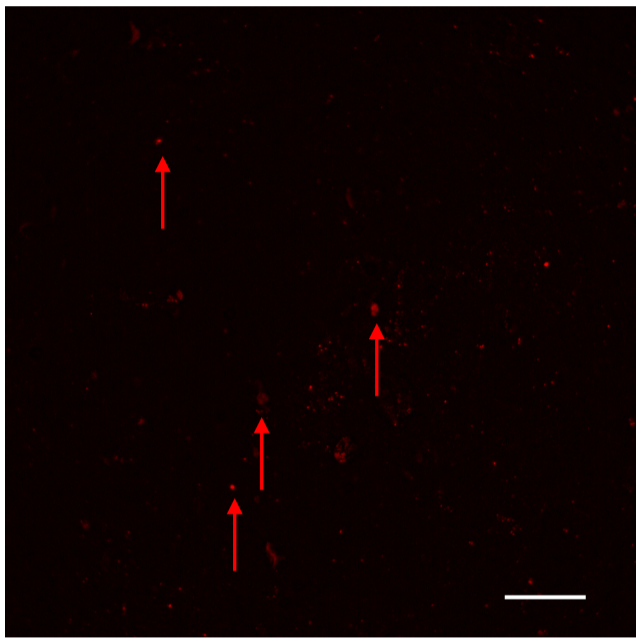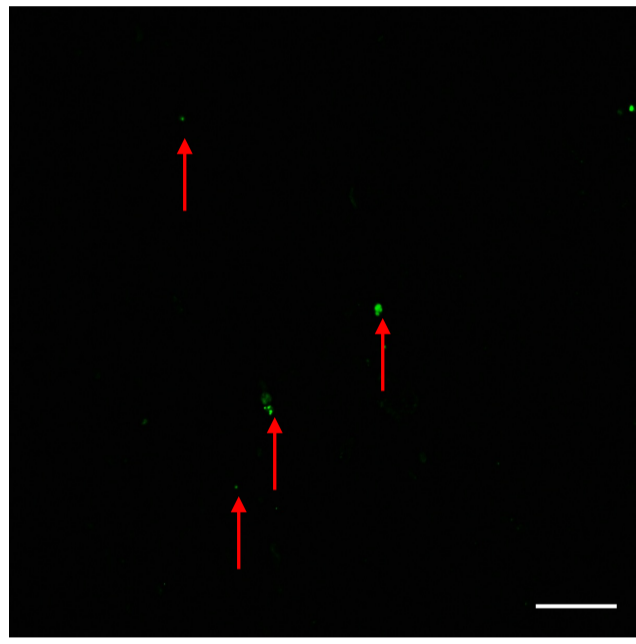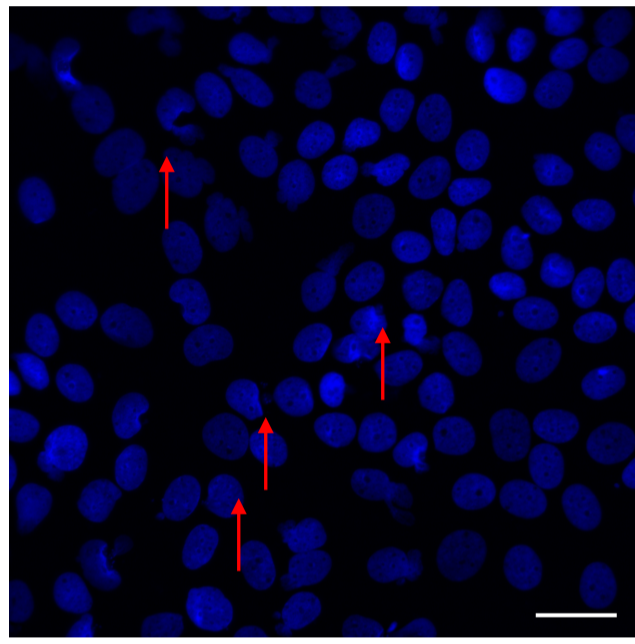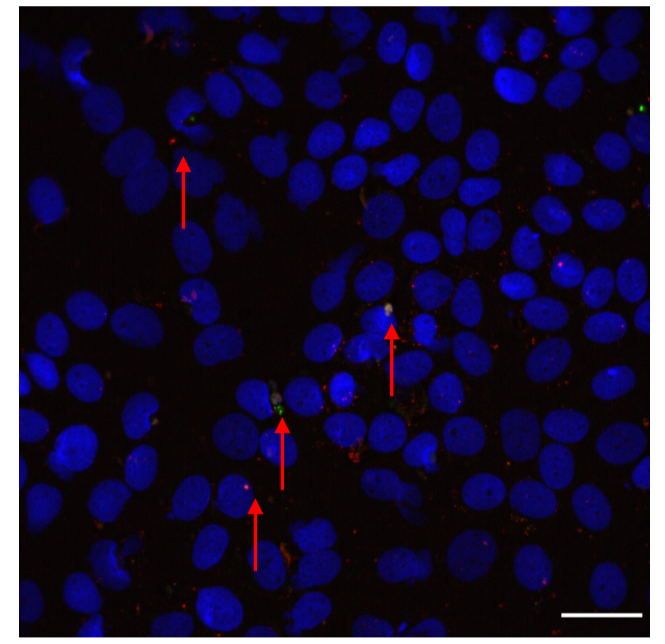

# Supplementary Figure 6

**Anti-CpFrataxin**

**Crypt-a-glo**

**DAPI**

**Merged**

**a.**

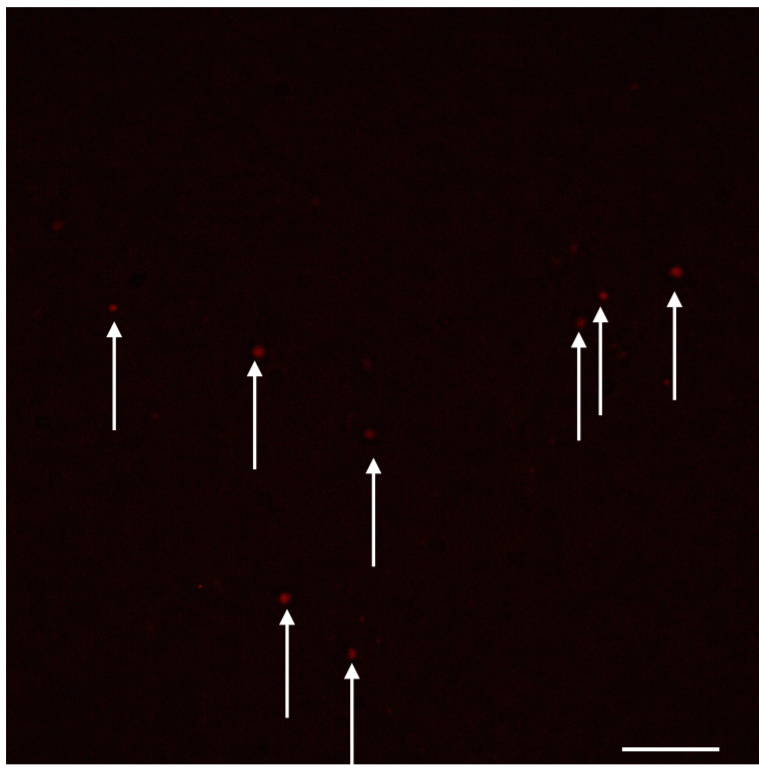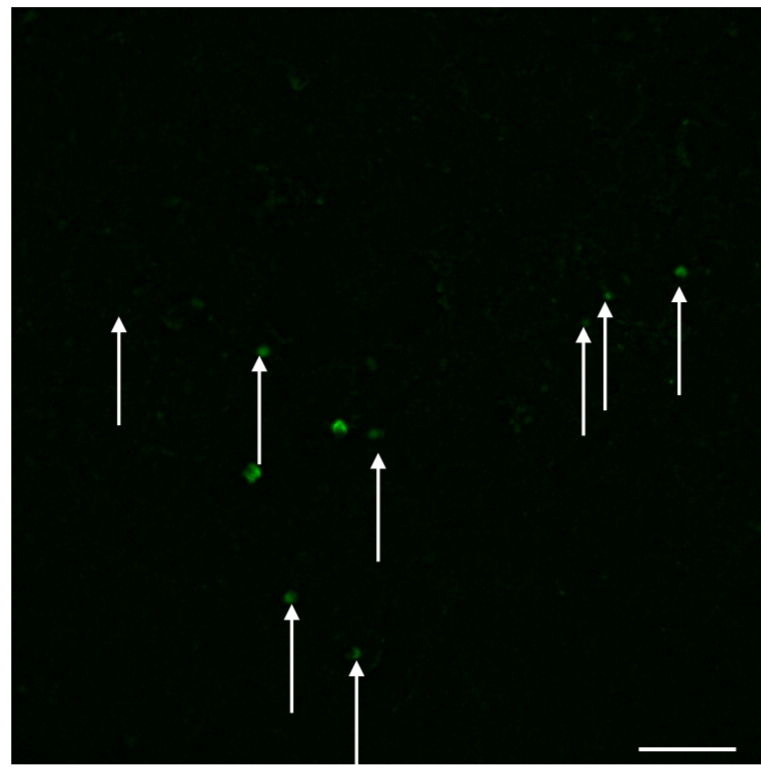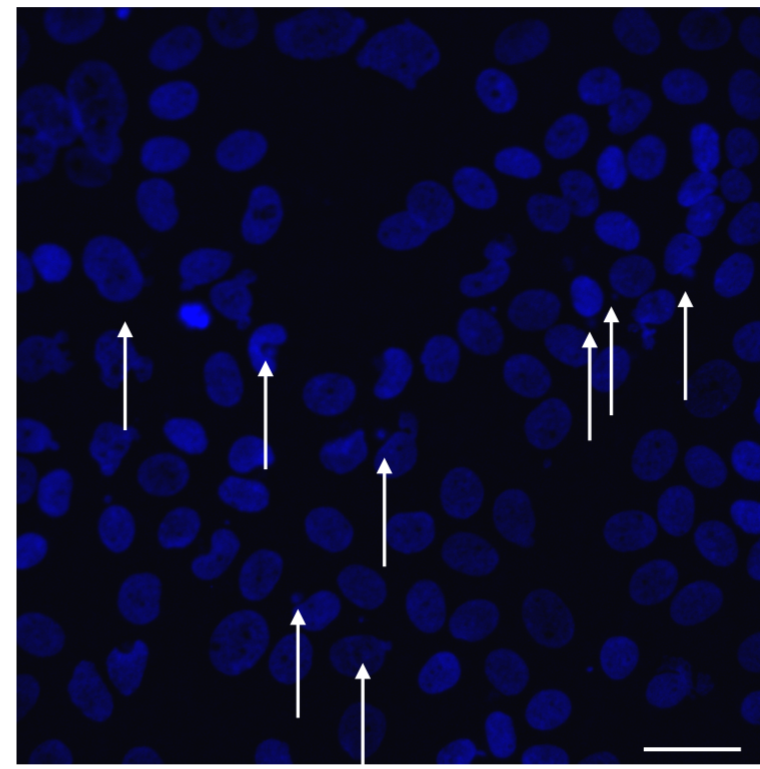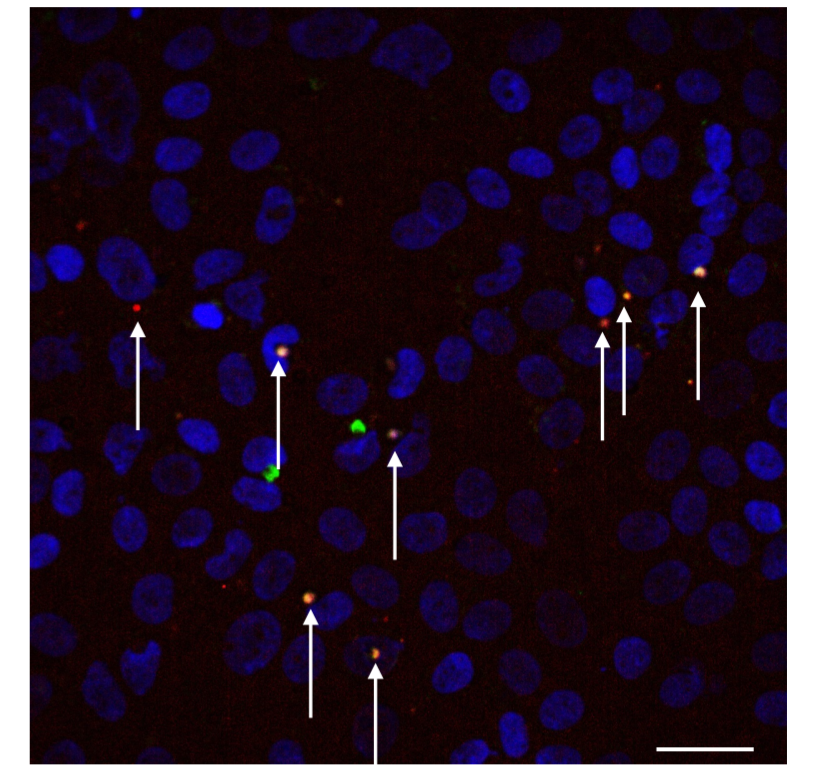

**b.**

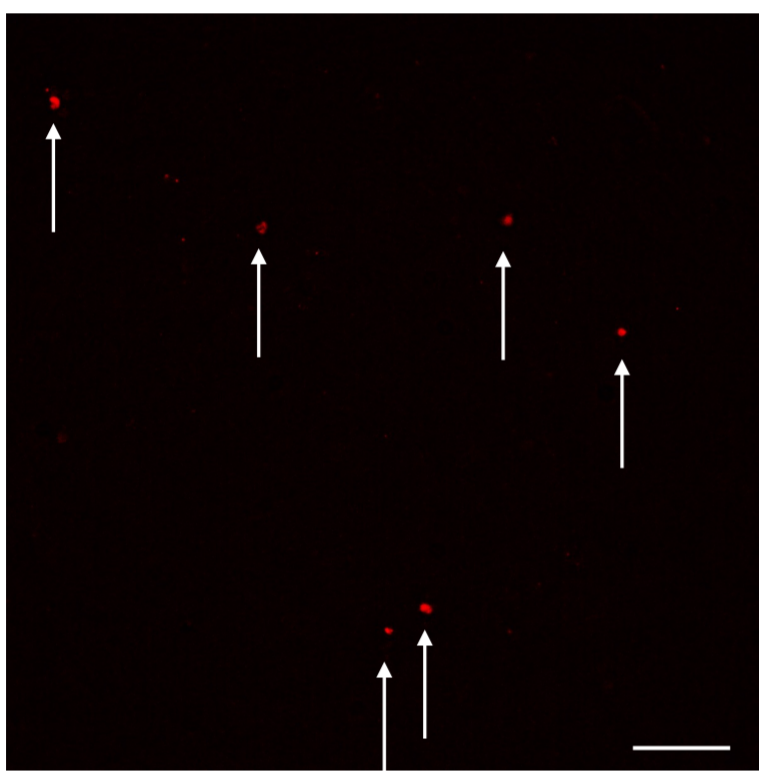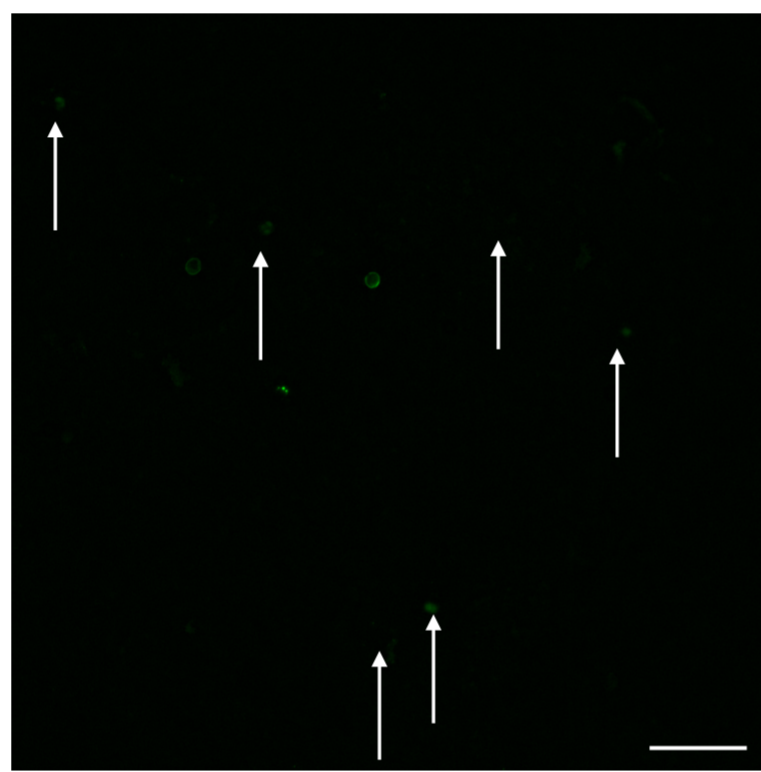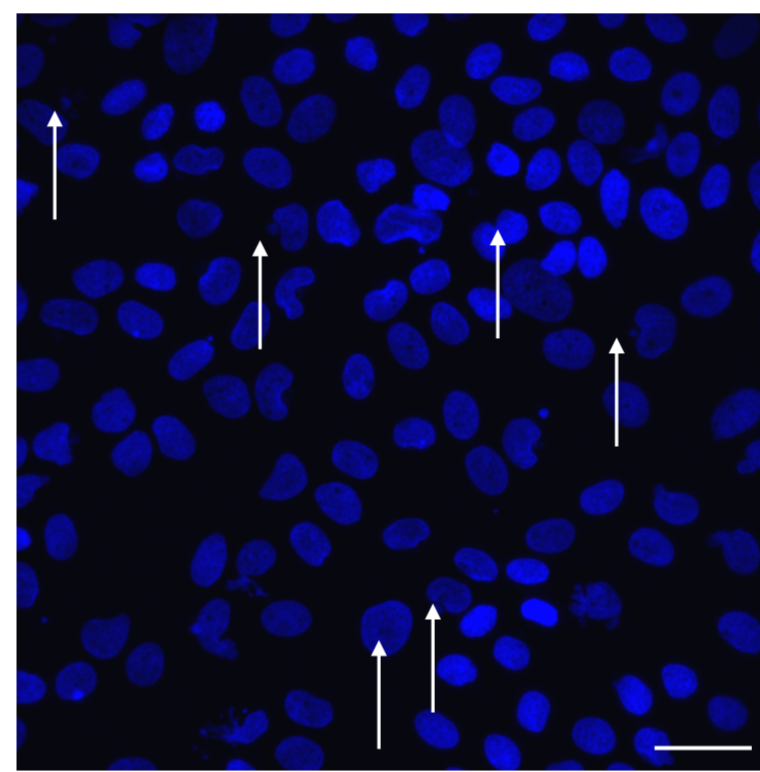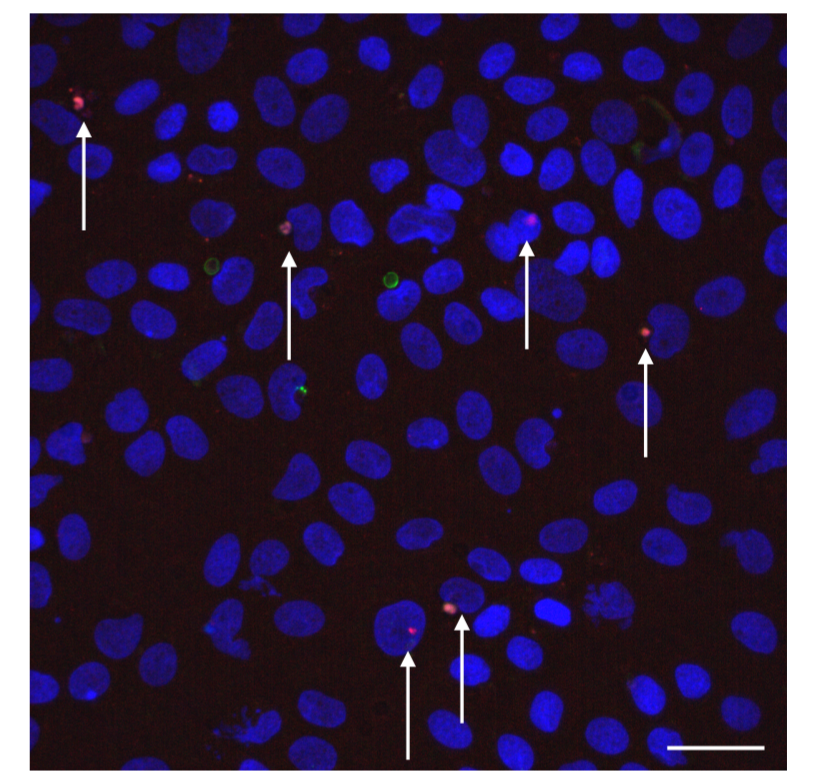

**Anti-CpFrataxin**

**Sporo-glo**

**DAPI**

**Merged**

**c.**

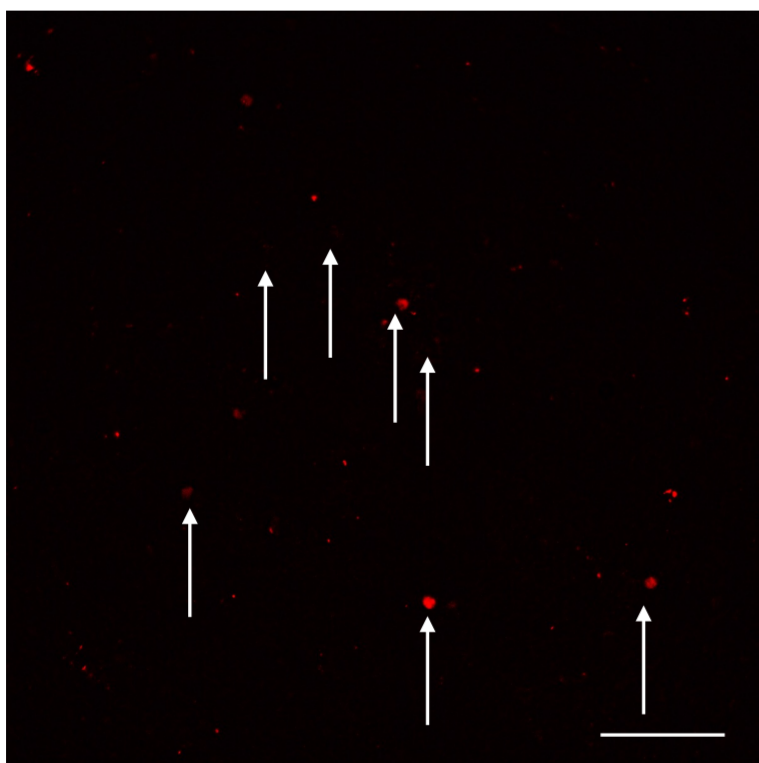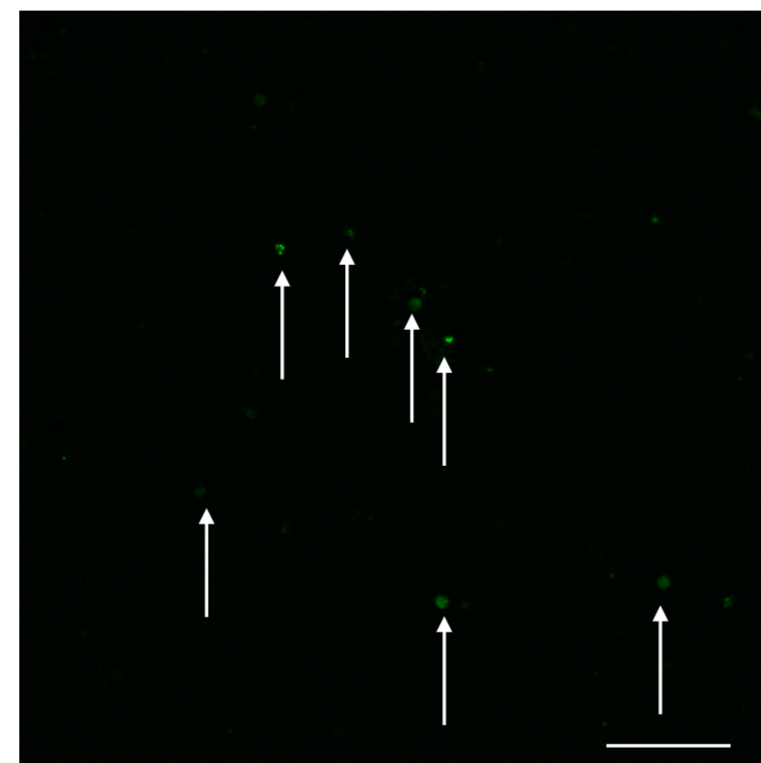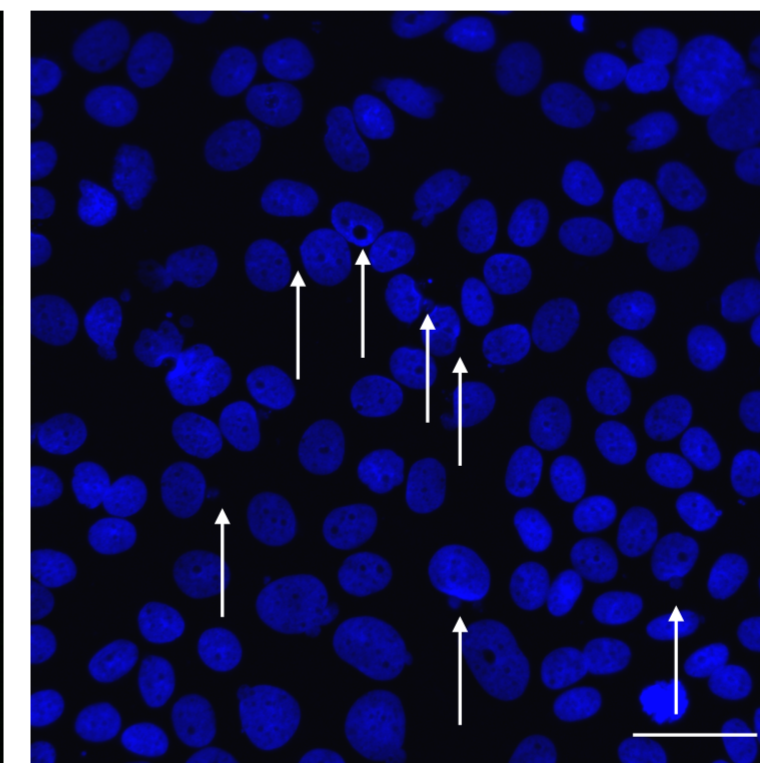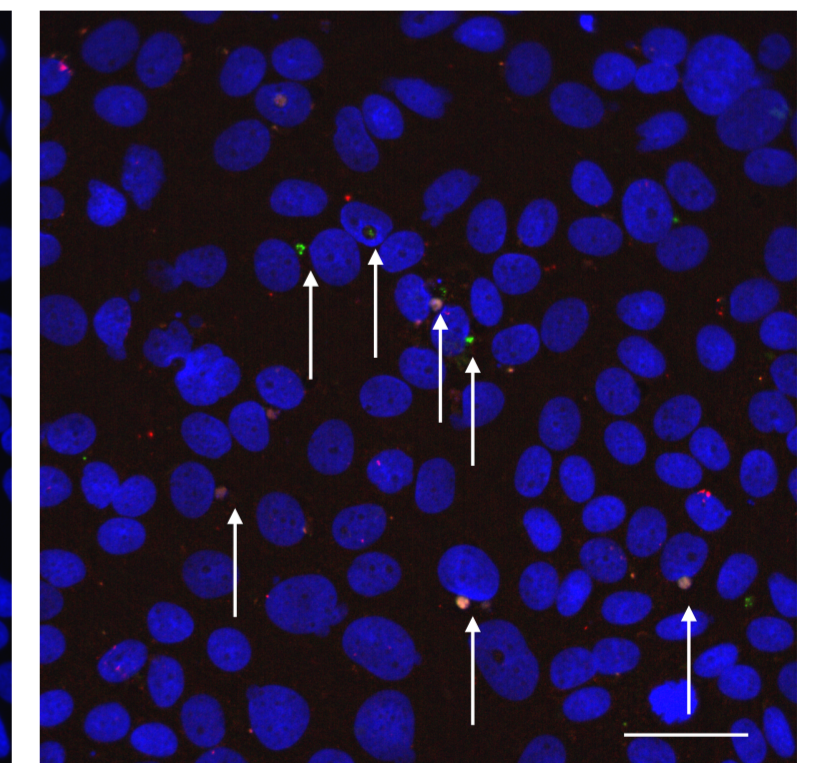



# Supplementary Figure S7

1 Selection of transformants on SC-leu plate

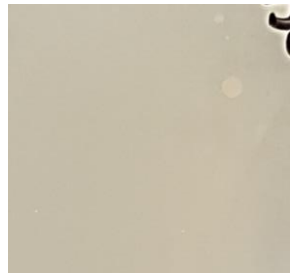

2 Sporulation

Tetrad (4 spores) →

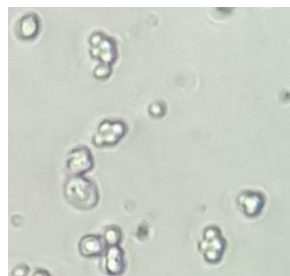

3 Selection of spores on selective media

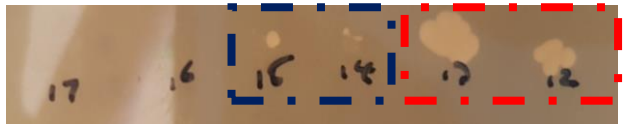

YEPD+G418

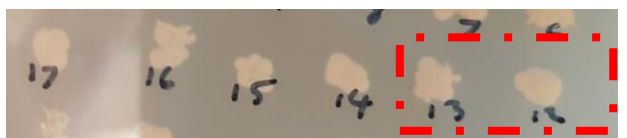

SC-leu

4 Determination of mating-type

Primers →

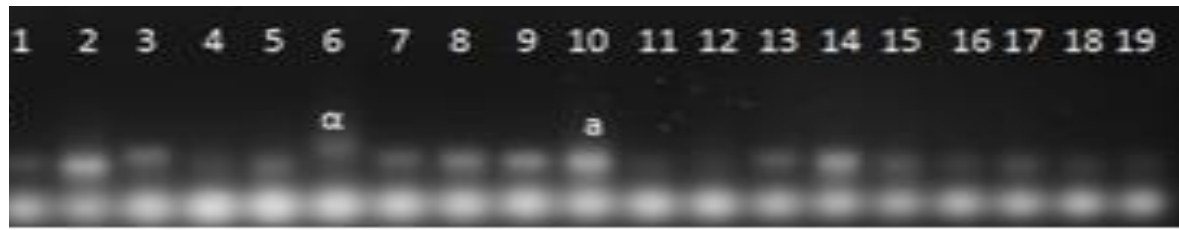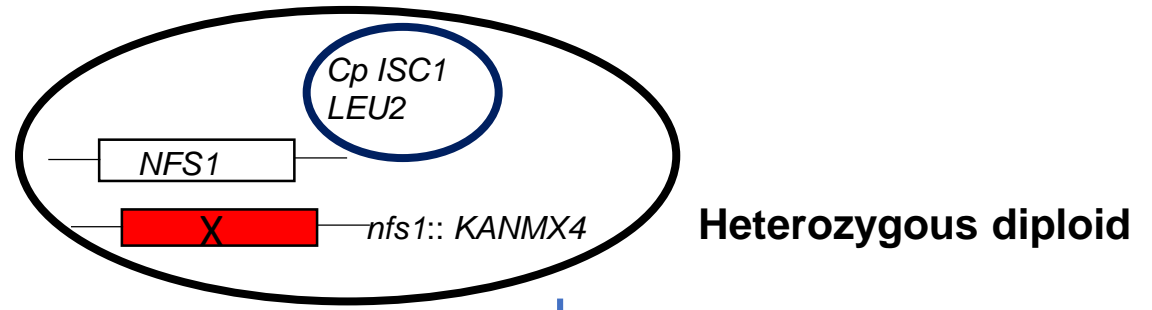

Heterozygous diploid

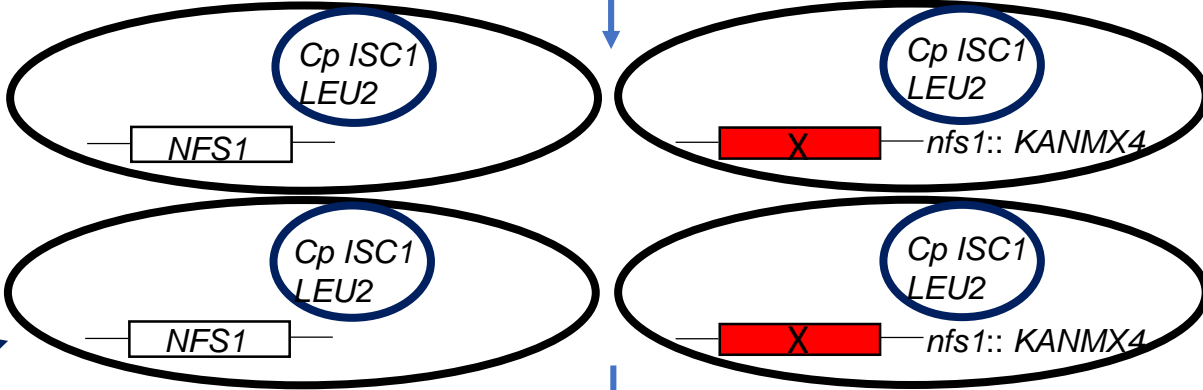

Spores- haploid

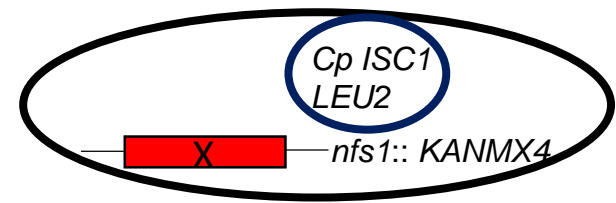

Complementation of mutants- haploid

# Supplementary Figure S8

a.

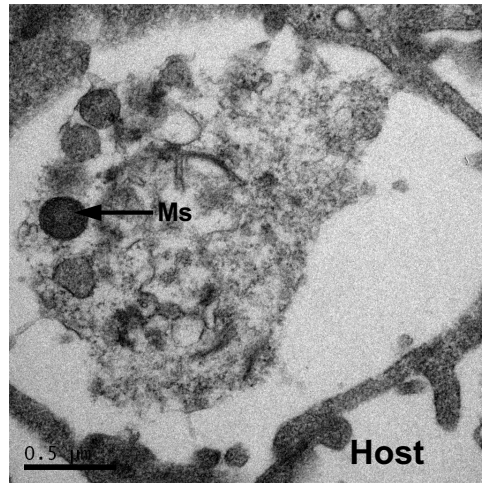

b.

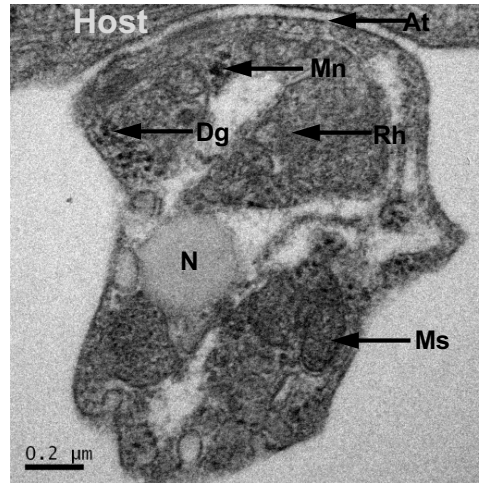

c.

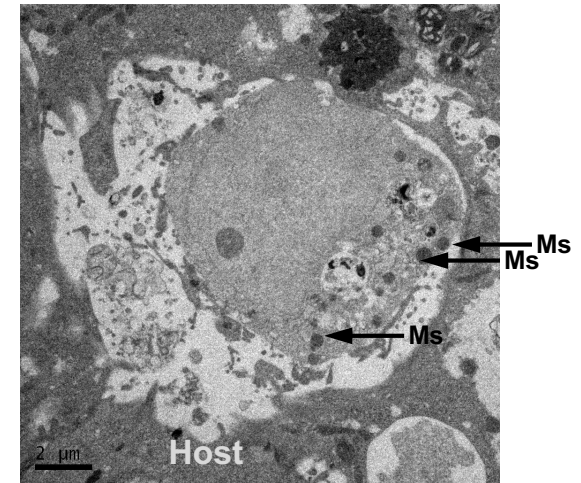

**Supplementary Table 2: *In silico* mitochondrial prediction of proteins involved in Fe-S cluster assembly in *Cryptosporidium* species**

| <b>Species</b>      | <b>Protein</b> | <b>MitoFates</b> | <b>Predotar</b> | <b>MitoProt</b> | <b>TargetP</b> |
|---------------------|----------------|------------------|-----------------|-----------------|----------------|
| <i>C. parvum</i>    | IscS           | 0.877            | 0.76            | 0.9930          | 0.849          |
|                     | IscU           | 0.889            | 0.50            | 0.9617          | 0.418          |
|                     | Frataxin       | 0.273            | 0.13            | 0.9485          | 0.586          |
|                     | Arh1           | 0                | 0               | 0.1862          | 0.012          |
|                     | Yah1           | 0.932            | 0.91            | 0.9941          | 0.946          |
|                     | MFRN1/Mrs3     | 0.017            | 0.00            | 0.0230          | 0.042          |
|                     | MFRN2/Mrs4     | 0.04             | 0.00            | 0.2602          | 0.016          |
|                     | Grx5           | 0                | 0.00            | 0.0965          | 0.021          |
|                     | mtHsp70        | 0.258            | 0.08            | 0.9877          | 0.741          |
|                     | Jac1           | 0.247            | 0.00            | 0.2205          | 0.187          |
|                     | Mge1           | 0.854            | 0.69            | 0.9674          | 0.887          |
|                     | Ind1           | 0.008            | 0.00            | 0.0737          | 0.093          |
|                     | Isa1           | -                | -               | -               | -              |
|                     | Isa2           | -                | -               | -               | -              |
|                     | Atm1           | 0.373            | 0.69            | 0.6661          | 0.581          |
| Erv1                | -              | -                | -               | -               |                |
| <i>C. hominis</i>   | IscS           | 0.819            | 0.72            | 0.9888          | 0.852          |
|                     | IscU           | 0.889            | 0.50            | 0.9617          | 0.418          |
|                     | Frataxin       | 0.243            | 0.16            | 0.8810          | 0.583          |
|                     | Arh1           | 0.045            | 0.06            | 0.4090          | 0.148          |
|                     | Yah1           | -                | -               | -               | -              |
|                     | MFRN1/Mrs3     | 0.020            | 0.00            | 0.0230          | 0.041          |
|                     | MFRN2/Mrs4     | 0.051            | 0.01            | 0.1975          | 0.020          |
|                     | Grx5           | 0.004            | 0.00            | 0.0406          | 0.067          |
|                     | mtHsp70        | 0.44             | 0.05            | 0.9329          | 0.548          |
|                     | Jac1           | 0.009            | 0.00            | 0.0091          | 0.244          |
|                     | Mge1           | 0.864            | 0.69            | 0.9695          | 0.866          |
|                     | Ind1           | 0.117            | 0.02            | 0.6708          | 0.337          |
|                     | Isa1           | -                | -               | -               | -              |
|                     | Isa2           | -                | -               | -               | -              |
|                     | Atm1           | 0.228            | 0.69            | 0.7737          | 0.573          |
| Erv1                | -              | -                | -               | -               |                |
| <i>C. ubiquitum</i> | IscS           | 0.887            | 0.52            | 0.9750          | 0.691          |
|                     | IscU           | 0.958            | 0.48            | 0.9303          | 0.582          |
|                     | Frataxin       | 0.492            | 0.10            | 0.9706          | 0.671          |
|                     | Arh1           | 0.055            | 0.24            | 0.1361          | 0.049          |
|                     | Yah1           | 0.716            | 0.24            | 0.9762          | 0.753          |
|                     | MFRN1/Mrs3     | 0.016            | 0.00            | 0.0472          | 0.039          |
|                     | MFRN2/Mrs4     | -                | -               | -               | -              |
|                     | Grx5           | 0                | 0.00            | 0.2028          | 0.067          |
|                     | mtHsp70        | 0.131            | 0.14            | 0.9588          | 0.717          |

|                            |            |       |      |        |       |
|----------------------------|------------|-------|------|--------|-------|
|                            | Jac1       | 0.009 | 0.00 | 0.0069 | 0.244 |
|                            | Mge1       | 0.622 | 0.23 | 0.9778 | 0.748 |
|                            | Ind1       | 0.277 | 0.03 | 0.8964 | 0.569 |
|                            | Isa1       | -     | -    | -      | -     |
|                            | Isa2       | -     | -    | -      | -     |
|                            | Atm1       | 0.372 | 0.49 | 0.8801 | 0.619 |
|                            | Erv1       | -     | -    | -      | -     |
| <b><i>C. andersoni</i></b> |            |       |      |        |       |
|                            | IscS       | 0.953 | 0.58 | 0.9230 | 0.942 |
|                            | IscU       | 0.865 | 0.34 | 0.8425 | 0.640 |
|                            | Frataxin   | 0.079 | 0.12 | 0.8360 | 0.156 |
|                            | Arh1       | 0.835 | 0.87 | 0.7677 | 0.882 |
|                            | Yah1       | 0     | 0.02 | 0.1832 | 0.176 |
|                            | MFRN1/Mrs3 | 0.010 | 0.00 | 0.0579 | 0.077 |
|                            | MFRN2/Mrs4 | -     | -    | -      | -     |
|                            | Grx5       | 0.022 | 0.13 | 0.2324 | 0.068 |
|                            | mtHsp70    | 0.543 | 0.00 | 0.9197 | 0.863 |
|                            | Jac1       | 0.006 | 0.61 | 0.0354 | 0.255 |
|                            | Mge1       | 0.117 | 0.01 | 0.9886 | 0.462 |
|                            | Ind1       | 0.012 | 0.02 | 0.0537 | 0.040 |
|                            | Isa1       | 0.003 | 0.02 | 0.3211 | 0.163 |
|                            | Isa2       | 0.580 | 0.47 | 0.8120 | 0.749 |
|                            | Atm1       | -     | -    | -      | -     |
|                            | Erv1       | 0.009 | 0.02 | 0.0777 | 0.064 |
| <b><i>C. muris</i></b>     |            |       |      |        |       |
|                            | IscS       | 0.931 | 0.77 | 0.9843 | 0.952 |
|                            | IscU       | 0.897 | 0.19 | 0.8456 | 0.656 |
|                            | Frataxin   | 0.083 | 0.17 | 0.7823 | 0.196 |
|                            | Arh1       | 0.792 | 0.90 | 0.8725 | 0.915 |
|                            | Yah1       | 0     | 0.01 | 0.1844 | 0.092 |
|                            | MFRN1/Mrs3 | 0.008 | 0.00 | 0.0565 | 0.064 |
|                            | MFRN2/Mrs4 | 0.018 | 0.00 | 0.0348 | 0.045 |
|                            | Grx5       | 0     | 0.00 | 0.1164 | 0.032 |
|                            | mtHsp70    | 0.382 | 0.16 | 0.9464 | 0.798 |
|                            | Jac1       | 0.010 | 0.00 | 0.0252 | 0.282 |
|                            | Mge1       | 0.112 | 0.64 | 0.9896 | 0.621 |
|                            | Ind1       | 0.019 | 0.01 | 0.0706 | 0.062 |
|                            | Isa1       | 0     | 0.01 | 0.4522 | 0.166 |
|                            | Isa2       | 0.976 | 0.63 | 0.8293 | 0.759 |
|                            | Atm1       | 0.320 | 0.46 | 0.9362 | 0.683 |
|                            | Erv1       | 0.013 | 0.02 | 0.0982 | 0.071 |

*In silico* prediction of potential mitochondrion-targeted proteins using MitoFates (Fukasawa et al. 2015) and displaying the “possibility of presequence”, MitoProt (Claros 1995) while displaying the “probability of export to mitochondria”, Predotar (Small et al. 2004) and TargetP (Emanuelsson et al. 2007), by displaying the probability of prediction of mitochondrial targeting signal. Possibilities above 85 % are shaded in light gray for MitoFates, MitoProt and Target P and above 65 % for Predotar.
